# Supplementary material for: MRI radiomics-based machine learning for classification of deep-seated lipoma and atypical lipomatous tumor of the extremities
Source: PubMed Central journal article supplement (PMC10338387; doi:10.1007/s11547-023-01657-y), 2023-06-19
Supplement: 11547_2023_1657_MOESM1_ESM.pdf [file 11547_2023_1657_MOESM1_ESM.pdf]

**MRI radiomics-based machine learning for classification of deep-seated lipoma and atypical lipomatous tumor of the extremities**

|                  | <b>Radiomics Quality Score</b> |
|------------------|--------------------------------|
| <b>Item 1</b>    | 1                              |
| <b>Item 2</b>    | 1                              |
| <b>Item 3</b>    | 0                              |
| <b>Item 4</b>    | 0                              |
| <b>Item 5</b>    | 3                              |
| <b>Item 6</b>    | 0                              |
| <b>Item 7</b>    | 0                              |
| <b>Item 8</b>    | 0                              |
| <b>Item 9</b>    | 2                              |
| <b>Item 10</b>   | 0                              |
| <b>Item 11</b>   | 0                              |
| <b>Item 12</b>   | 3                              |
| <b>Item 13</b>   | 2                              |
| <b>Item 14</b>   | 2                              |
| <b>Item 15</b>   | 0                              |
| <b>Item 16</b>   | 0                              |
| <b>total</b>     | 14                             |
| <b>total (%)</b> | 38,89                          |

Reference: Lambin et al. Radiomics: the bridge between medical imaging and personalized medicine. Nat Rev Clin Oncol 2017;14:749-762. doi: 10.1038/nrclinonc.2017.141
